1                                   **The hidden cost of receiving favors:**

2                                   **A theory of indebtedness**

3  
4                                   *Xiaoxue Gao<sup>1,2</sup>, Eshin Jolly<sup>3</sup>, Hongbo Yu<sup>1,2,4</sup>, Huiying Liu<sup>5</sup>,*

5                                   *Xiaolin Zhou<sup>1,2,6,7</sup>\*, Luke J. Chang<sup>3</sup>\**

6  
7                                   <sup>1</sup> School of Psychological and Cognitive Sciences, Peking University,  
8                                   Beijing 100871, China

9                                   <sup>2</sup> Beijing Key Laboratory of Behavior and Mental Health, Peking University,  
10                                   Beijing 100871, China

11                                   <sup>3</sup> Department of Psychological and Brain Sciences, Dartmouth College,  
12                                   Hanover, NH 03755, USA

13                                   <sup>4</sup> Department of Psychological and Brain Sciences, University of California Santa  
14                                   Barbara, Santa Barbara, CA 93106-9660, USA

15                                   <sup>5</sup> Mental Health Education Center, Zhengzhou University,  
16                                   Zhengzhou 450001, Henan, China

17                                   <sup>6</sup> School of Business and Management, Shanghai International Studies University,  
18                                   Shanghai 200083, China

19                                   <sup>7</sup> PKU-IDG/McGovern Institute for Brain Research, Peking University,  
20                                   Beijing 100871, China

21  
22                                   \*Correspondence to:

23                                   Luke J. Chang ([luke.j.chang@dartmouth.edu](mailto:luke.j.chang@dartmouth.edu)) and Xiaolin Zhou ([xz104@pku.edu.cn](mailto:xz104@pku.edu.cn))

24 **Abstract**

25

26 Receiving help or a favor from another person can sometimes have a hidden cost. In  
27 this study, we explore these hidden costs by developing and validating a theoretical  
28 model of indebtedness across three studies that combine large-scale experience  
29 sampling, interpersonal games, computational modeling, and neuroimaging. Our  
30 model captures how individuals infer the altruistic and strategic intentions of the  
31 benefactor. These inferences produce distinct feelings of guilt and obligation that  
32 together comprise indebtedness and motivate reciprocity. Altruistic intentions convey  
33 care and concern and are associated with activity in the insula, dorsolateral prefrontal  
34 cortex and ventromedial prefrontal cortex, while strategic intentions convey  
35 expectations of future reciprocity and are associated with activation in the temporal  
36 parietal junction and dorsomedial prefrontal cortex. We further develop a neural  
37 utility model of indebtedness using multivariate patterns of brain activity that captures  
38 the tradeoff between these feelings and reliably predicts reciprocity behavior.

39

40

41 **Key words:** indebtedness; guilt; obligation; reciprocity; intention

## 42 **Introduction**

43 Giving gifts and exchanging favors are ubiquitous behaviors that provide a concrete  
44 expression of a relationship between individuals or groups (Carmichael and MacLeod,  
45 1997; Sherry Jr, 1983). Altruistic favors convey concern for a partner's well-being  
46 and signal a communal relationship such as a friendship, romance, or familial tie  
47 (Clark and Mills, 1993; Clark and Mills, 2012; Nowak and Sigmund, 2005). These  
48 altruistic favors are widely known to foster the beneficiary's positive feeling of  
49 gratitude, which can motivate reciprocity behaviors that reinforce the communal  
50 relationship (Algoe, 2012; Algoe et al., 2008; Elfers and Hlava, 2016; McCullough et  
51 al., 2001). Yet in daily life, favors and gifts can also be strategic and imply an  
52 expectation of reciprocal exchanges, particularly in more transactive relationships  
53 (Akerlof, 1982; Carmichael and MacLeod, 1997; Clark and Mills, 1993; Clark and  
54 Mills, 2012; Neilson, 1999; Trivers, 1971). Accepting these favors can have a hidden  
55 cost, in which the beneficiary may feel indebted to the favor-doer and motivated to  
56 reciprocate the favor at some future point in time (Greenberg, 1980; Greenberg and  
57 Westcott, 1983; Kolm, 2008; Regan, 1971). These types of behaviors are widespread  
58 and can be found in most domains of social interaction. For example, a physician may  
59 preferentially prescribe medications from a pharmaceutical company that treated them  
60 to an expensive meal (Bal, 2005; Malmendier and Schmidt, 2012), or a politician  
61 might vote favorably on policies that benefit an organization, which provided  
62 generous campaign contributions (Fehr and Gächter, 2000). However, very little is  
63 known about the psychological and neural mechanisms underlying this hidden cost of  
64 *indebtedness* and how it ultimately impacts the beneficiary.

65

66 Immediately upon receipt of an unsolicited gift or favor, the beneficiary is likely to  
67 engage in a mentalizing process to infer the benefactor's intentions (Falk et al., 2003;  
68 Gonzalez and Chang, 2019; Sul et al., 2017). Does this person care about me? Or do  
69 they expect something in return? According to appraisal theory (Ellsworth and

70 Scherer, 2003; Frijda, 1993; Frijda et al., 1989; Lazarus and Smith, 1988; Scherer,  
71 1999; Smith and Ellsworth, 1985), these types of cognitive appraisals are critical in  
72 determining what types of emotions are experienced and how the beneficiary will  
73 ultimately respond. Psychological Game Theory (PGT) (Battigalli et al., 2019;  
74 Battigalli and Dufwenberg, 2009; Geanakoplos et al., 1989) has provided tools for  
75 modeling these higher order beliefs about intentions, expectations, and fairness in the  
76 context of reciprocity decisions (Dufwenberg and Kirchsteiger, 2004; Falk et al., 2003;  
77 Rabin, 1993; Sul et al., 2017). Actions that are inferred to be motivated by altruistic  
78 intentions are more likely to be rewarded, while those thought to be motivated by  
79 strategic or self-interested intentions are more likely to be punished (Dufwenberg and  
80 Kirchsteiger, 2004; Falk et al., 2003; Rabin, 1993; Sul et al., 2017). These intention  
81 inferences can produce different emotions in the beneficiary (Chang and Smith, 2015).  
82 For example, if the benefactor's actions are believed to be altruistic and convey  
83 concern for the beneficiary's outcome, the beneficiary is likely to experience gratitude,  
84 but may also feel personally responsible for burdening the benefactor and experience  
85 the negative feeling of guilt (Baumeister et al., 1994; Benedict, 1946; Chang et al.,  
86 2011; Kotani, 2002; Naito and Washizu, 2015). Both of these feelings motivate  
87 reciprocity out of concern for the benefactor, i.e., communal concern (Baumeister et  
88 al., 1994; Le et al., 2018). In contrast, if the benefactors' intentions are perceived to  
89 be strategic or even duplicitous, then the beneficiary is more likely to feel a negative  
90 feeling of obligation, which can also motivate reciprocity (Greenberg, 1980;  
91 Greenberg and Westcott, 1983; Watkins et al., 2006). This obligation-based  
92 reciprocity is likely driven by external pressures, such as social expectations and  
93 potential reputational costs, rather than the communal concern for the benefactor  
94 (Rotella et al., 2020). In everyday life, inferences about a benefactor's intentions are  
95 often mixed, raising the possibility that the negative feeling of indebtedness in  
96 response to favors may be comprised of feelings of communal concern (i.e., guilt) and  
97 obligation.

98

99 In this study, we propose a theoretical model of indebtedness to characterize how the  
100 beneficiaries' appraisals and emotions lead to reciprocal behaviors (Fig. 1).  
101 Specifically, we propose that there are two components of indebtedness - guilt and the  
102 sense of obligation, which are derived from appraisals about the benefactor's altruistic  
103 and strategic intentions and can differentially impact the beneficiary's reciprocal  
104 behaviors. The guilt component of indebtedness, along with gratitude, arises from  
105 appraisals of the benefactor's altruistic intentions (i.e., perceived care from the help)  
106 and increases communal concern. In contrast, the obligation component of  
107 indebtedness results from appraisals of the benefactor's strategic intentions (e.g.,  
108 second-order belief of the benefactor's expectation for repayment). Building on  
109 previous models of other-regarding preferences (Dufwenberg and Kirchsteiger, 2004;  
110 Fehr and Schmidt, 1999; Rabin, 1993), we model the utility associated with reciprocal  
111 behaviors as reflecting the trade-off between these different feelings (Eq. 1).

112

$$113 \quad U(D_B) = \theta_B * \pi_B + (1 - \theta_B) * (\phi_B * U_{Communal} + (1 - \phi_B) * U_{Obligation}) \quad \mathbf{Eq.1}$$

114

115 The central idea of this model is that upon receiving a favor from a benefactor (player  
116 A), the beneficiary (player B) chooses an action ( $D_B$ ) that maximizes his/her overall  
117 utility ( $U$ ), where utility is comprised of a mixture of values arising from self-interest  
118 ( $\pi$ ) weighted by a greed parameter  $\theta$ , and feelings of communal concern and  
119 obligation ( $U_{Communal}$  and  $U_{Obligation}$ ), which are weighted by the parameter  $\phi$ . Larger  
120  $\phi$  values reflect the beneficiary's higher sensitivity to feelings of communal concern  
121 relative to obligation.

122

123 In this paper, we validate the predictions of our model across multiple studies. In  
124 Study 1 (N = 1619), we explore lay intuitions of indebtedness using large-scale  
125 experience sampling. In Study 2 (Study 2a, N = 51; Study 2b, N = 57), we evaluate

126 how different components of indebtedness are generated and influence behaviors by  
127 combining computational modeling with an interpersonal game, in which benefactors  
128 choose to spend some amount of their initial endowment to reduce the amount of pain  
129 experienced by the participants. In Study 3 (N = 53), we investigate how different  
130 feelings of indebtedness are represented in the brain using functional magnetic  
131 resonance imaging (fMRI) and how they vary across individuals.  
132

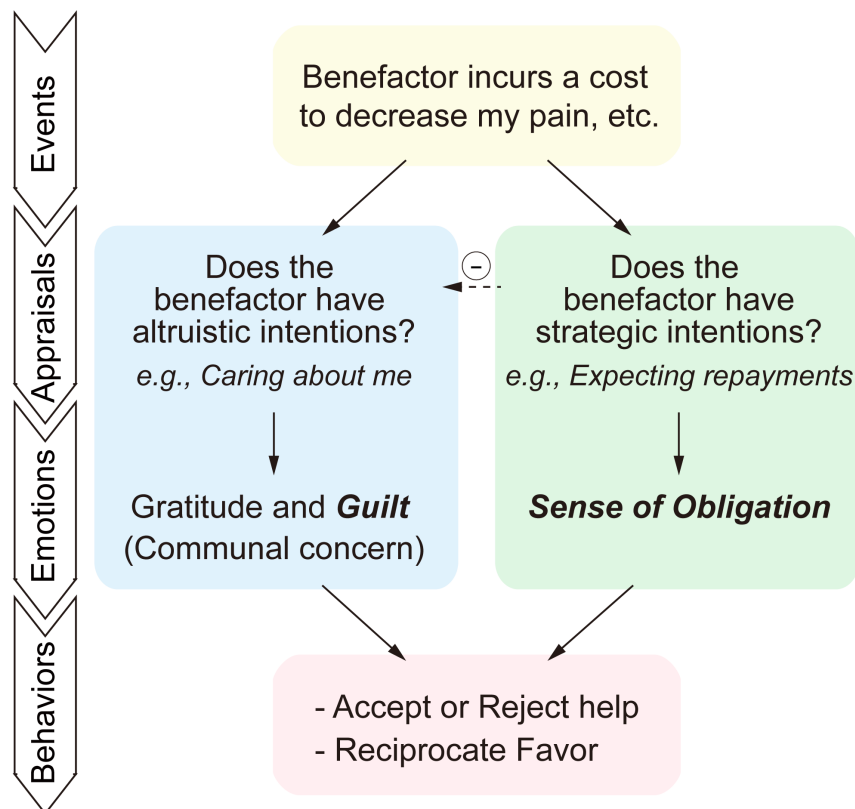

133 **Fig. 1 Theoretical model of indebtedness.** We propose that there are two  
134 components of indebtedness, guilt and the sense of obligation, which are derived from  
135 appraisals about the benefactor's altruistic and strategic intentions and can  
136 differentially impact the beneficiary's reciprocal behaviors. The higher the perception  
137 of the benefactor's strategic intention, the lower the perception of the benefactor's  
138 altruistic intention. The guilt component of indebtedness, along with gratitude, arises  
139 from appraisals of the benefactor's altruistic intentions (i.e., perceived care from the  
140 help) and increases communal concern. In contrast, the obligation component of  
141 indebtedness results from appraisals of the benefactor's strategic intentions (e.g.,  
142 second-order belief of the benefactor's expectation for repayment). The beneficiary  
143 makes trade-offs between communal and obligation feelings to determine the  
144 reciprocal behaviors to favors (e.g., accept or reject the help and reciprocity after  
145 receiving help).

## 146 **Results**

### 147 *Indebtedness is a mixed feeling comprised of guilt and obligation*

148 In Study 1, we used an online questionnaire to characterize the subjective experience  
149 of indebtedness in Chinese participants. First, participants (N = 1,619) described  
150 specific experiences, in which they either accepted or rejected help from another  
151 individual and rated their subjective experiences of these events. A regression  
152 analysis revealed that both self-reported guilt and obligation ratings independently  
153 explained indebtedness ratings ( $\beta_{\text{guilt}} = 0.70 \pm 0.02$ ,  $t = 40.08$ ,  $p < 0.001$ ;  $\beta_{\text{obligation}} =$   
154  $0.40 \pm 0.02$ ,  $t = 2.31$ ,  $p = 0.021$ ; Fig. 2A-I). Models with both guilt and obligation  
155 ratings outperformed models with only a single predictor (Full model vs. guilt-only  
156 model:  $F = 5.34$ ,  $p = 0.021$ , Full model vs. obligation-only model:  $F = 1606.1$ ,  $p <$   
157  $0.001$ , Table S1). Second, participants were asked to select sources of indebtedness in  
158 their daily lives and 91.9% attributed the guilt for burdening the benefactor and 39.2%  
159 indicated the sense of obligation resulting from the benefactor's ulterior intention as  
160 the source of indebtedness (Fig. 2A-II, Fig. S1A). Third, participants were asked to  
161 describe their own personal definitions of indebtedness. The 100 words with the  
162 highest frequency in the definitions of indebtedness were annotated by an independent  
163 sample of participants (N = 80) to extract the emotion-related words. We applied  
164 Latent Dirichlet Allocation (LDA) based topic modeling (Blei and Lafferty, 2006) to  
165 the emotion words to demonstrate that indebtedness is comprised of 2 latent topics  
166 (Fig. S1B). Topic 1 accounted for 77.0% of the emotional words, including  
167 communal-concern-related words such as "guilt," "feel," "feel sorry," "feel indebted,"  
168 and "gratitude". In contrast, Topic 2 accounted for 23.0% of the emotional words,  
169 including words pertaining to burden and negative bodily states, such as  
170 "uncomfortable," "uneasy," "trouble," "pressure," and "burden" (Fig. 2A-III, see  
171 supplementary materials). These results suggest that the subjective experience of  
172 indebtedness is comprised of feelings of both guilt and obligation.

173

174 Next we examined how participants' emotions ratings were related to their  
 175 self-reported response to the help (Fig. 2B). We found that gratitude, indebtedness,  
 176 guilt, and the sense of obligation positively predicted participants' reported need to  
 177 repay after receiving help (gratitude:  $\beta = 0.45 \pm 0.03$ ,  $t = 9.52$ ,  $p < 0.001$ ; indebtedness:  
 178  $\beta = 0.34 \pm 0.03$ ,  $t = 12.86$ ,  $p < 0.001$ ; guilt:  $\beta = 0.32 \pm 0.03$ ,  $t = 11.13$ ,  $p < 0.001$ ;  
 179 obligation:  $\beta = 0.19 \pm 0.04$ ,  $t = 4.90$ ,  $p < 0.001$ ). However, decisions to reject help were  
 180 negatively predicted by anticipatory gratitude ( $\beta = -0.71 \pm 0.05$ ,  $t = 9.52$ ,  $p < 0.001$ ),  
 181 but positively predicted by anticipatory indebtedness, guilt, and obligation  
 182 (indebtedness:  $\beta = 0.40 \pm 0.06$ ,  $t = 7.16$ ,  $p < 0.001$ ; guilt:  $\beta = 0.54 \pm 0.05$ ,  $t = 9.97$ ,  $p <$   
 183  $0.001$ ; obligation:  $\beta = 0.55 \pm 0.05$ ,  $t = 10.99$ ,  $p < 0.001$ ). These results suggest the dual  
 184 components of indebtedness (i.e., guilt and the sense of obligation) along with  
 185 gratitude influence the behavioral responses to other's favors.

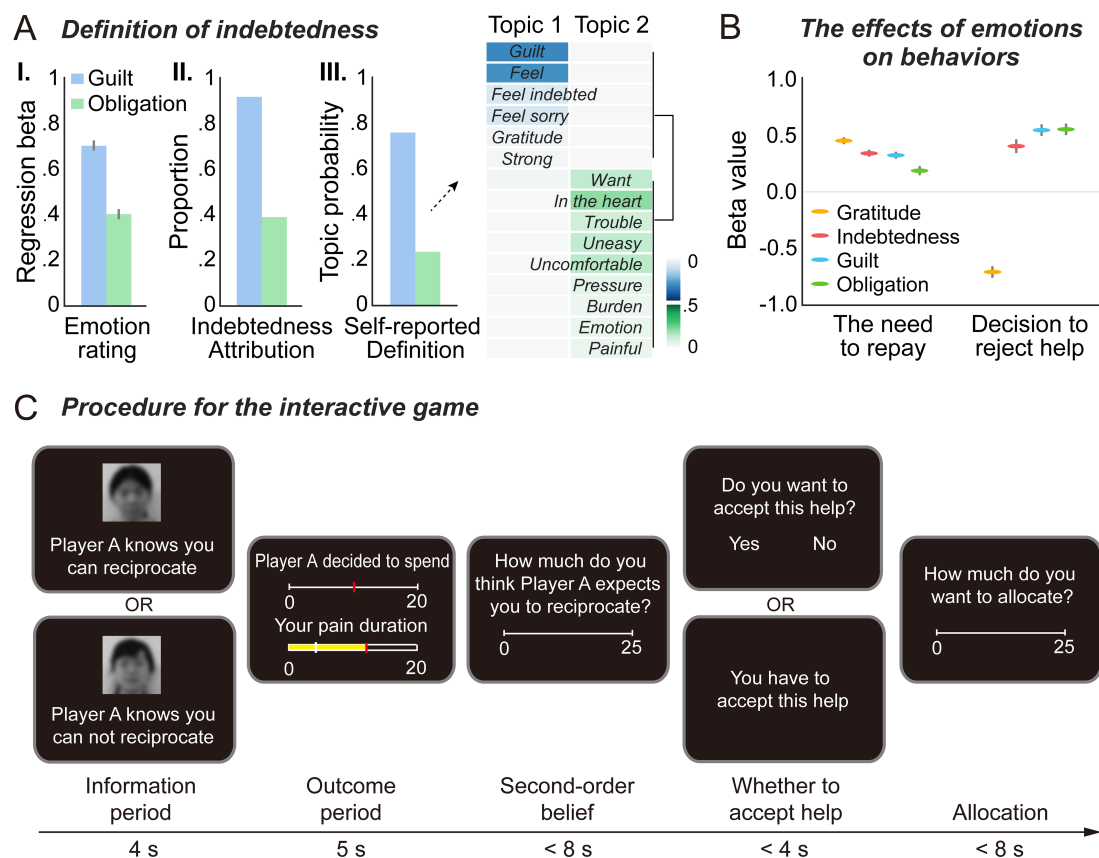

186 **Fig. 2 Subjective experiences of indebtedness.** (A) Contributions of guilt and  
 187 obligation to indebtedness in Study 1 in (I) the emotion ratings in the daily event  
 188 recalling, (II) attribution of guilt and obligation as source of indebtedness, and (III)



189 topic modeling of the emotional words in self-reported definition of indebtedness.  
190 The background color underlying each word represents the probability of this word in  
191 the current topic. **(B)** The influence of emotions on the self-reported need to  
192 reciprocate after receiving help and decisions to reject help. **(C)** Procedure for the  
193 interactive game. In each round, the participant was paired with a different  
194 anonymous co-player, who decided how much endowment to spend (i.e., benefactor's  
195 cost) to reduce the participant's pain duration. Participants indicated how much they  
196 thought this co-player expected them to reciprocate (i.e., second-order belief of the  
197 benefactor's expectation for repayment). In half of the trials, participants could decide  
198 whether to accept the help; in the remaining trials, participants had to accept help and  
199 could reciprocate by allocating monetary points to the co-player. We manipulated the  
200 perception of the benefactor's intentions by providing information about whether the  
201 co-player knew the participant could (Strategic condition), or could not (Altruistic  
202 condition) reciprocate after receiving help. After the experiment, all trials were  
203 displayed again and participants recalled their perceived care, gratitude, indebtedness,  
204 sense of obligation and guilt when they received the help. Error bars represent the  
205 standard error of means.

206

### 207 ***Benefactor's intentions lead to diverging components of indebtedness.***

208 Next, we tested the predictions of the theoretical model of indebtedness using a  
209 laboratory-based task involving interactions between participants (Fig. 2C). In each  
210 round of the task, the participant was paired with a different anonymous co-player,  
211 who decided how much of their endowment to spend (i.e., benefactor's cost) to reduce  
212 the participant's duration of pain (i.e., electrical stimulation). Unbeknownst to  
213 participants, co-players' decisions were pre-determined by the computer program  
214 (Table S2). Participants indicated how much they thought this co-player expected  
215 them to reciprocate (i.e., second-order belief of the benefactor's expectation for  
216 repayment). We manipulated perceptions of the benefactor's intentions by providing  
217 information about whether the benefactor knew that the participant could (Strategic  
218 condition) or could not (Altruistic condition) reciprocate after receiving help. In half  
219 of the trials, participants could decide whether to accept the help; in the remaining  
220 trials, participants were only allowed to accept help and could reciprocate by  
221 allocating monetary points to the co-player regardless of the condition. After the  
222 experiment, participants recalled how much they believed the benefactor cared for

223 them, as well as their feelings of gratitude, indebtedness, sense of obligation, and guilt  
224 when they received the help for each trial. We manipulated information about the  
225 benefactor's intentions and benefactor's cost in Study 2a (N = 51), and further  
226 manipulated the exchange rate between the benefactor's cost and the participant's  
227 benefit (i.e., the help efficiency) in Study 2b (N = 57) (Table S2). As results were  
228 replicated in studies 2a and 2b (Table S3), for brevity we combine these datasets  
229 when reporting results in the main text.

230

231 Our theoretical model predicts that participants will feel indebted to benefactors who  
232 spent money to reduce their pain, but for different reasons depending on the perceived  
233 intentions of the benefactor. Consistent with this prediction, participants reported  
234 feeling indebted in both conditions, but slightly more in the Altruistic compared to the  
235 Strategic condition (Fig. 3A, Fig. S2A,  $\beta = 0.09 \pm 0.03$ ,  $t = 2.98$ ,  $p = 0.004$ ). Moreover,  
236 our manipulation successfully impacted participants' appraisals, as participants  
237 reported increased second-order beliefs of the benefactor's expectations for repayment  
238 ( $\beta = 0.53 \pm 0.03$ ,  $t = 15.71$ ,  $p < 0.001$ ) and decreased perceived care ( $\beta = -0.31 \pm 0.02$ ,  $t$   
239  $= -13.90$ ,  $p < 0.001$ ) in the Strategic compared to the Altruistic condition (Fig. 3A, see  
240 Table S3 for a summary of results). Both of these effects were magnified as the  
241 benefactor's cost increased (Fig. 3, B-C; second-order belief:  $\beta = 0.22 \pm 0.02$ ,  $t = 13.13$ ,  
242  $p < 0.001$ ; perceived care:  $\beta = -0.08 \pm 0.01$ ,  $t = -6.65$ ,  $p < 0.001$ ). In addition, perceived  
243 care was negatively associated with second-order beliefs ( $\beta = -0.44 \pm 0.04$ ,  $t = -11.29$ ,  
244  $p < 0.001$ ) controlling for the effects of experimental variables (benefactor's intention,  
245 cost, and efficiency).

246

247 The manipulation of information regarding benefactors' intentions not only impacted  
248 the participants' appraisals, but also their emotions. Participants reported feeling a  
249 greater sense of obligation (Fig. 3A, Fig. S2B,  $\beta = 0.30 \pm 0.03$ ,  $t = 9.28$ ,  $p < 0.001$ ), but  
250 less gratitude and guilt (Fig. 3A, Fig. S2, C-D; gratitude:  $\beta = -0.27 \pm 0.02$ ,  $t = -13.18$ ,  $p$

251 < 0.001; guilt:  $\beta = -0.25 \pm 0.02$ ,  $t = -10.30$ ,  $p < 0.001$ ), in the Strategic condition  
252 relative to the Altruistic condition. Similar to the appraisal results, these effects were  
253 magnified as the benefactor's cost increased (Fig. S2, B-D; obligation:  $\beta = 0.11 \pm 0.01$ ,  
254  $t = 8.85$ ,  $p < 0.001$ ; gratitude:  $\beta = -0.06 \pm 0.01$ ,  $t = -4.20$ ,  $p < 0.001$ ; guilt:  $\beta =$   
255  $-0.05 \pm 0.01$ ,  $t = -4.28$ ,  $p < 0.001$ ). A principal component analysis (PCA) on the  
256 subjective appraisals and emotion ratings revealed that 77% of the variance in ratings  
257 could be explained by two principal components (PCs) (Fig. 3, D-E, and Fig. S2E),  
258 which appeared to reflect two distinct subjective experiences. PC 1 reflected  
259 participants' perception that the benefactor cared about their welfare and resulted in  
260 emotions of gratitude and guilt, while PC2 reflected participants' second-order beliefs  
261 about the benefactor's expectation for repayment and the sense of obligation.  
262 Interestingly, indebtedness moderately loaded on both PCs. This interpretation was  
263 further supported by mediation analyses. Second-order beliefs mediated the effects of  
264 the experimental variables (benefactor's intention, cost, and efficiency) on obligation  
265 (Indirect effect =  $0.34 \pm 0.03$ ,  $Z = 11.729$ ,  $p < 0.001$ , Fig. S3, A-B), whereas perceived  
266 care mediated the effects of experimental variables on gratitude and guilt (Indirect  
267 effect =  $0.34 \pm 0.04$ ,  $Z = 10.00$ ,  $p < 0.001$ , Fig. S3, C-D). Together, these results  
268 provide further support for the predictions of our theoretical model that indebtedness  
269 is comprised of two distinct feelings. The guilt component of indebtedness, along  
270 with gratitude, arises from the belief that the benefactor acts from altruistic intentions,  
271 while the obligation component of indebtedness arises when the benefactor's  
272 intentions are perceived to be strategic.

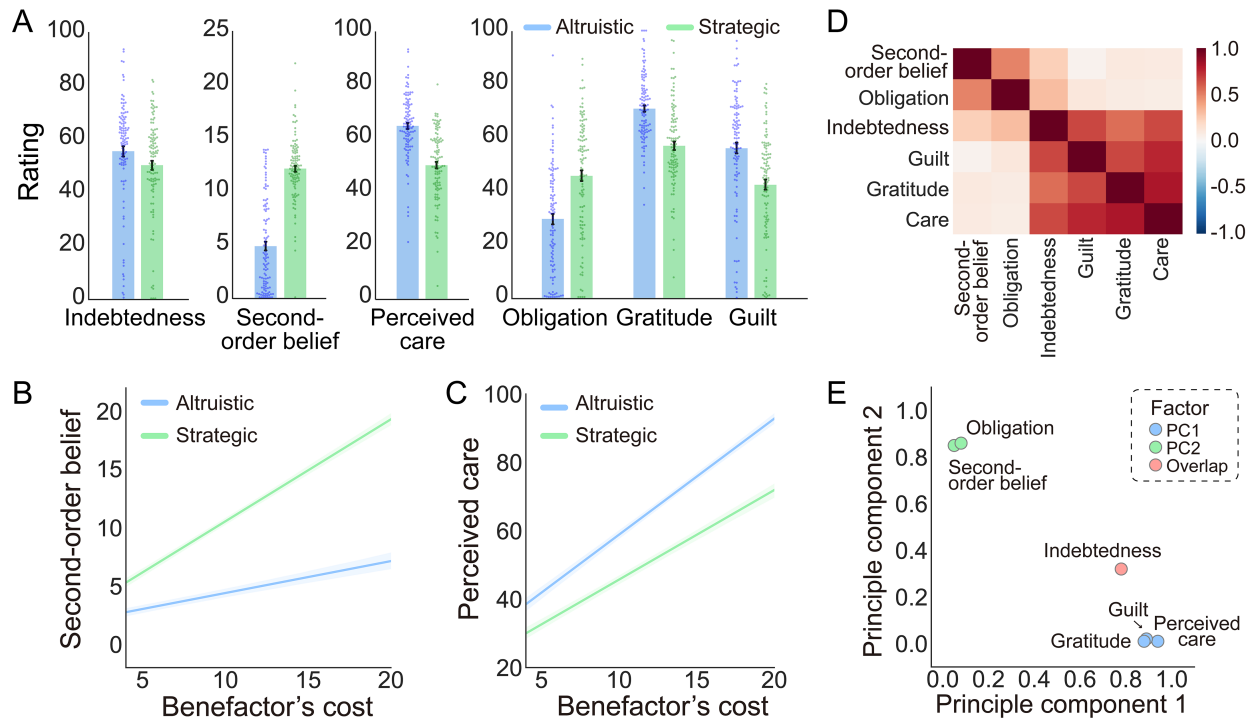

273 **Fig. 3 Appraisals and emotional responses to benefactor's help with altruistic**  
 274 **versus strategic intentions. (A)** Participant's appraisal (i.e., second-order belief of  
 275 how much the benefactor expected for repayment and perceived care) and emotion  
 276 ratings (indebtedness, the sense of obligation, gratitude and guilt) in Altruistic and  
 277 Strategic conditions. Each dot represents the average rating in the corresponding  
 278 condition for each participant. **(B and C)** Participant's second-order beliefs of how  
 279 much the benefactor expected repayment and perceived care plotted as functions of  
 280 the benefactor's intention and cost. **(D)** Correlation matrix between participant's  
 281 appraisal and emotion ratings. **(E)** Principal component analysis showed that  
 282 participants' appraisals and emotions could be reduced to two principal components  
 283 (PCs), which appeared to reflect two distinct subjective experiences. PC 1 reflects  
 284 participants' perception that the benefactor cared about their welfare and resulted in  
 285 emotions of gratitude and guilt, while PC2 reflects participants' second-order beliefs  
 286 about the benefactor's expectation for repayment and the sense of obligation. Error  
 287 bars represent the standard error of means.

288

### 289 *Behavioral responses to help are influenced by benefactor's intentions*

290 Next, we examined participant's behaviors in response to receiving help from a  
 291 benefactor. Specifically, we were interested in whether participants would reciprocate  
 292 the favor by sending some of their own money back to the beneficiary and also  
 293 whether they might outright reject the beneficiary's help given the opportunity. These

294 behaviors comprise two crucial reciprocal responses in the beneficiary indicated by  
 295 previous studies on indebtedness (Greenberg, 1980; Greenberg and Shapiro, 1971;  
 296 Greenberg and Westcott, 1983). We found that participants reciprocated more money  
 297 as the benefactor's cost increased in both conditions,  $\beta = 0.64 \pm 0.02$ ,  $t = 25.77$ ,  $p <$   
 298  $0.001$ . This effect was slightly enhanced in the Altruistic relative to the Strategic  
 299 condition,  $\beta = 0.03 \pm 0.01$ ,  $t = 3.02$ ,  $p = 0.003$  (Fig. 4A). A logistic regression revealed  
 300 that when given the chance to reject the help, participants were more likely to reject  
 301 help in the Strategic condition where they reported more sense of obligation (rejection  
 302 rate =  $0.37 \pm 0.10$ ), compared to the Altruistic condition (rejection rate =  $0.30 \pm 0.03$ ),  $\beta$   
 303 =  $0.28 \pm 0.10$ ,  $z = 617.00$ ,  $p < 0.001$  (Fig. 4B).

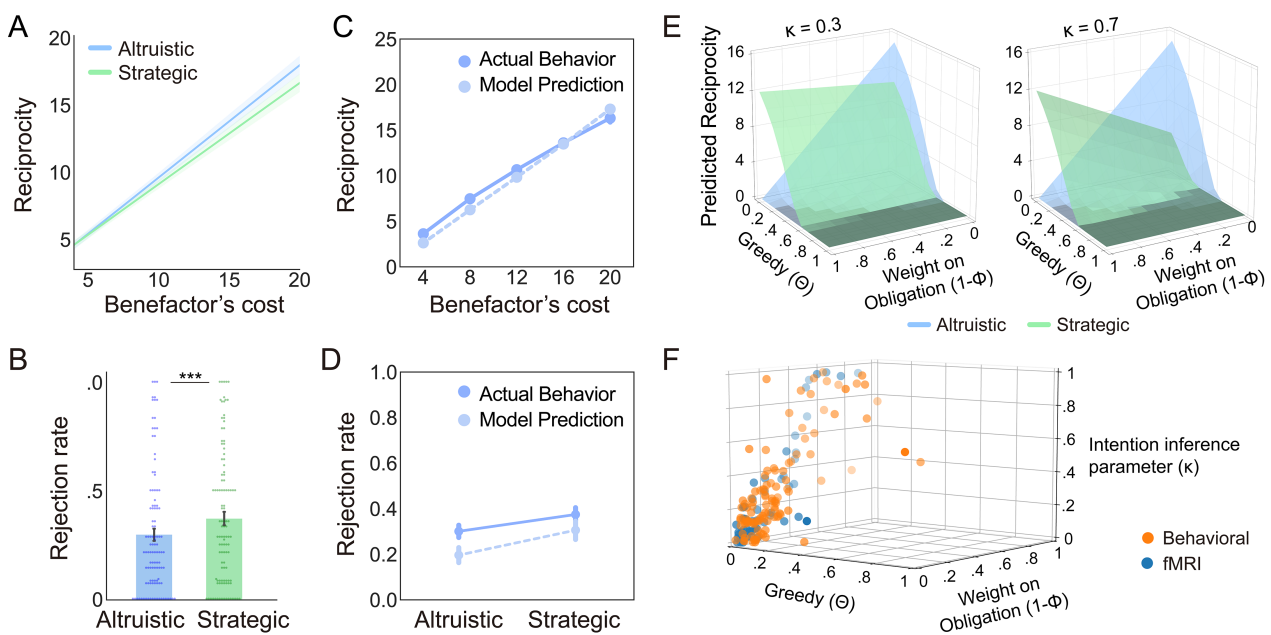

304 **Fig. 4 Computational model of indebtedness.** (A) Participants' reciprocity behavior  
 305 in each trial plotted as function of the benefactor's intention and cost. (B) Overall rate  
 306 of rejecting help in Altruistic and Strategic conditions, \*\*\*  $p < 0.001$ . Each dot  
 307 represents the average rejection rate in the corresponding condition for each  
 308 participant. (C) The observed amounts of reciprocity after receiving help and  
 309 predictions generated by computational model at each level of the benefactor's cost.  
 310 (D) The observed rates of rejecting help and predictions generated by computational  
 311 model in Altruistic and Strategic conditions. (E) Model simulations for predicted  
 312 reciprocity behavior in Altruistic and Strategic conditions at different  
 313 parameterizations. (F) Best fitting parameter estimates of the computational model of  
 314 indebtedness for each participant. Error bars represent the standard error of means.

315 ***Computational model captures feelings underlying responses to receiving favors***

316 Next we evaluated how well our computational model (Eq. 1) could account for the  
317 behavioral data. Since our results above suggested that communal and obligation  
318 feelings are derived from the appraisals of perceived care ( $\omega_B$ ) and second-order  
319 belief ( $E_B''$ ) of the benefactor's expectation for repayment respectively, we modeled  
320 these two appraisals to index communal and obligation feelings. The parameter  $\kappa_B$   
321 captures the process of inferring intentions representing the degree to which the  
322 perceived strategic intention reduced the perceived altruistic intention (see Methods  
323 and Supplemental Materials for more details). We found that our model was able to  
324 successfully capture the patterns of participants' reciprocity after receiving help ( $r^2 =$   
325  $0.81, p < 0.001$ ; Fig. 4C) and decisions of whether to accept help (accuracy = 80.00%;  
326 Fig. 4D). In addition, each term of our model was able to accurately capture  
327 self-reported appraisals of second-order belief of the benefactor's expectation for  
328 repayment ( $\beta = 0.68 \pm 0.03, t = 21.48, p < 0.001$ ; Fig. S4, A-B) and perceived care ( $\beta$   
329  $= 0.64 \pm 0.02, t = 26.76, p < 0.001$ ; Fig. S4, C-D), which provides further validation  
330 that we are accurately modeling the intended psychological processes. In addition, the  
331 indebtedness model with both communal and obligation feelings outperformed other  
332 plausible models, such as: (a) models that only include a single term, (b) models with  
333 separate parameters for each term, (c) a model that assumes participants reciprocate as  
334 a function of the cost to the benefactor, and (d) a model that assumes that participants  
335 are motivated to minimize inequity in payments (Fehr and Schmidt, 1999) (Table S5  
336 and S6). Furthermore, parameter recovery tests indicated that the parameters of the  
337 indebtedness model were identifiable (correlation between true and recovered  
338 parameters: reciprocity  $r = 0.94 \pm 0.07, p < 0.001$ ; decisions of whether to reject help  
339  $r = 0.67 \pm 0.36, p < 0.001$ ; Table S7 and S8). See *SI Results* for detailed results of  
340 computational modeling and Table S9 and S10 for descriptive statistics for model  
341 parameters.

342

343 A simulation of the model across varying combinations of the  $\Theta$ ,  $\Phi$  and  $\kappa$  parameters  
344 reveals diverging predictions of the beneficiaries' response to altruistic and strategic  
345 favors (Fig. 4E). Not surprisingly, greedier individuals (higher  $\Theta$ ) are less likely to  
346 reciprocate others' favors. However, reciprocity changes as a function of the tradeoff

347 between communal ( $\Phi$ ) and obligation ( $1 - \Phi$ ) feelings and interacts with the intention  
348 inference parameter ( $\kappa$ ). As the emphasis on obligation increases, the amount of  
349 reciprocity to strategic favors increases whereas that to altruistic favors decreases; this  
350 effect is enhanced as  $\kappa$  increases. We found that most participants had low  $\Theta$  values  
351 (i.e., greed), but showed a wide range of individual differences in  $\kappa$  and  $\Phi$  parameters  
352 (Fig. 4F). Interestingly, the degree to which the perceived strategic intention reduced  
353 the perceived altruistic intention during intention inference ( $\kappa$ ), was positively  
354 associated with the relative weight on obligation ( $1-\Phi$ ) during reciprocity ( $r = 0.79, p$   
355  $< 0.001$ ). This suggests that the participants who cared more about the benefactor's  
356 strategic intentions also tended to be motivated by obligation when deciding how  
357 much money to reciprocate.

358

### 359 ***Communal and obligation feelings are associated with distinct neural processes***

360 Next we explored the neural basis of indebtedness guided by our computational  
361 model and behavioral findings. Participants (N = 53) in Study 3 completed the same  
362 task as Study 2 while undergoing fMRI scanning, except that they were unable to  
363 reject help. We successfully replicated all of the behavioral results observed in Study  
364 2 (Table S4; Fig. S6). We were specifically interested in brain processes during the  
365 Outcome period, where participants learned about the benefactor's decision to help.  
366 Using a model-based fMRI analytic approach (O'doherty et al., 2007), we fit three  
367 separate general linear models (GLMs) to each voxel's timeseries to identify brain  
368 regions that tracked different components of the computational model. These included  
369 trial-by-trial values of: (1) the amount of reciprocity, (2) communal concern, which  
370 depended on the perceived care from the help ( $\omega_B$ ), and (3) obligation, which  
371 depended on the second-order belief of the benefactor's expectation for repayment  
372 ( $E_B''$ ), defined using a linear contrast (Strategic\_Lowcost +1, Strategic\_Midcost +2,  
373 Strategic\_Highcost +3, and Altruistic\_condition -6) (Chang et al., 2011). We found  
374 that trial-by-trial reciprocity behavior correlated with activity in bilateral dorsal lateral  
375 prefrontal cortex (dlPFC, peak MNI coordinates: [-45, 5, 29] and [45, 11, 35]),  
376 bilateral inferior parietal lobule (IPL, [-54, -40, 53] and [51, -28, 47]), precuneus [6,

377 -64, 41], and bilateral inferior temporal gyrus (ITG, [-45, -61, -13] and [51, -52, -13])  
378 (Fig. 5A, Table S11). Trial-by-trial communal feelings tracked with activity in the  
379 ventromedial prefrontal cortex (vmPFC, [0 33 -22]), anterior insula (aINS, [-24, 11,  
380 -16]), precuneus [3, -46, 38], bilateral dlPFC ([-48, 20, -26] and [45, 11, 38]) and  
381 bilateral ITG ([-54, -76, -7] and [48, -46, -16]) (Fig. 5B; Tables S11). Linear contrasts  
382 of obligation revealed significant activations in dorsomedial prefrontal cortex  
383 (dmPFC, [-9, 47, 41]) and left temporo-parietal junction (TPJ, [-57, -61, 26]) (Fig. 5C,  
384 Tables S11).

385

386 To aid in interpreting these results, we performed meta-analytic decoding (Chang et  
387 al., 2013) using Neurosynth (Yarkoni et al., 2011). Reciprocity-related activity was  
388 primarily associated with "Attention," "Calculation," and "Memory" terms.  
389 Communal feelings related activity was similar to the reciprocity results, but was  
390 additionally associated with "Default mode" term. Obligation activity was highly  
391 associated with terms related to "Social," "Theory of mind (ToM)," and "Memory"  
392 (Fig. 5D). Together, these neuroimaging results reveal differing neural bases  
393 underlying feelings of communal concern and obligation and support the role of  
394 intention inference in the generation of these feelings. The processing of communal  
395 feelings was associated with activity in vmPFC, an area in default mode network that  
396 has been linked to gratitude (Fox et al., 2015; Yu et al., 2017; Yu et al., 2018),  
397 positive social value and kind intention, (Cooper et al., 2010; Ruff and Fehr, 2014a)  
398 as well as the insula, which has been previously related to guilt (Chang et al., 2011;  
399 Koban et al., 2013; Yu et al., 2014). In contrast, the processing of obligation was  
400 associated with the activations of theory of mind network, including dmPFC and TPJ,  
401 which is commonly observed when representing other peoples' intentions or  
402 strategies (Hampton et al., 2008; Ruff and Fehr, 2014a; Van Overwalle and Baetens,  
403 2009).



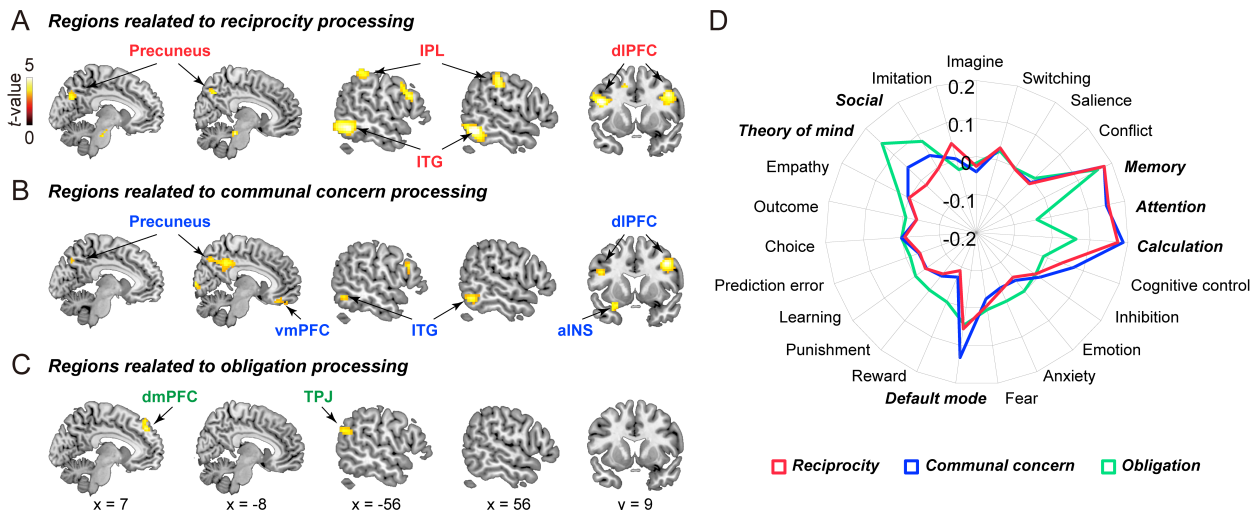

404 **Fig. 5 Neural processes associated with reciprocity, communal concern and**  
 405 **obligation. (A)** Brain regions responding parametrically to trial-by-trial amounts of  
 406 reciprocity. **(B)** Brain regions responding parametrically to trial-by-trial communal  
 407 concern, which depended on the perceived care from the help ( $\omega_B$ ). **(C)** Brain regions  
 408 identified in the parametric contrast for obligation ( $E_B''$ ), the responses of which  
 409 monotonically increased in the strategic condition relative to the altruistic condition.  
 410 **(D)** Meta-analytical decoding for the neural correlates of reciprocity, communal  
 411 concern and obligation, respectively.

412

### 413 *Neural utility model of indebtedness predicts reciprocity behavior*

414 Having established that our model of indebtedness was able to accurately capture the  
 415 psychological processes underlying feelings of communal concern and obligation, we  
 416 next sought to test whether we could use signals directly from the brain to construct a  
 417 utility function and predict reciprocity behavior (Fig. 6A). We trained two  
 418 whole-brain models using principle components regression with 5-fold  
 419 cross-validation (Chang et al., 2015; Wager et al., 2013; Woo et al., 2017) to predict  
 420 feelings of communal concern ( $\omega_B$ ) and obligation ( $E_B''$ ) using brain activity during  
 421 the Outcome period of the task separately for each participant. These whole-brain  
 422 patterns were able to successfully predict the model representations of these feelings  
 423 for each participant on new trials, though with modest effect sizes (communal concern  
 424 pattern: average  $r = 0.21 \pm 0.03$ ,  $fisher-z = 0.20 \pm 0.02$ ,  $permutation p < 0.001$ ;

425 obligation pattern: average  $r = 0.10 \pm 0.03$ ,  $fisher-z = 0.09 \pm 0.02$ ,  $permutation p =$   
426 0.004).

427

428 Next, we assessed the degree to which our brain models could account for reciprocity  
429 behavior. We used cross-validated neural predictions of communal concern ( $\omega_B$ ) and  
430 obligation ( $E_B''$ ) feelings as inputs to our computational model of reciprocity behavior  
431 instead of the original terms (Eq. 2):

432

$$U(D_B) = \theta_B * \pi_B + (1 - \theta_B) * (\phi_B * \vec{\beta}_{map} \cdot \vec{Communal}_{map} + (1 - \phi_B) * \vec{\beta}_{map} \cdot \vec{Obligation}_{map}), \quad \text{Eq. 2}$$

434

435 where  $\vec{\beta}_{map}$  refers to the vector of brain intensities observed during the Outcome  
436 phase and  $\vec{Communal}_{map}$  and  $\vec{Obligation}_{map}$  refer to the multivariate brain models  
437 predictive of communal and obligation feelings respectively.

438

439 We were able to reliably predict reciprocity behavior with our computational model  
440 informed only by predictions of communal and obligation feelings derived purely  
441 from brain responses (average  $r = 0.10 \pm 0.01$ ,  $fisher-z = 0.10 \pm 0.01$ ,  $permutation p =$   
442 0.013,  $AIC = 324.04 \pm 4.93$ ). The brain-based predictions of the weights on obligation  
443 were closely correlated with those estimated by directly fitting the model to behavior,  
444  $r = 0.88$ ,  $p < 0.001$ . As a benchmark, this model performed slightly worse than our  
445 overall ability to directly predict reciprocity behavior from multivariate patterns of  
446 brain activity (Fig. 6A, reciprocity pattern: average  $r = 0.18 \pm 0.03$ ,  $fisher-z = 0.17 \pm$   
447 0.03,  $permutation p < 0.001$ ,  $AIC = 321.07 \pm 4.81$ ; paired  $t$  test for AIC,  $t_{32} = 5.26$ ,  $p$   
448  $< 0.001$ ), which we take as the upper bound of the neural signal that can predict  
449 behavior.

### A Multivariate patterns for model components

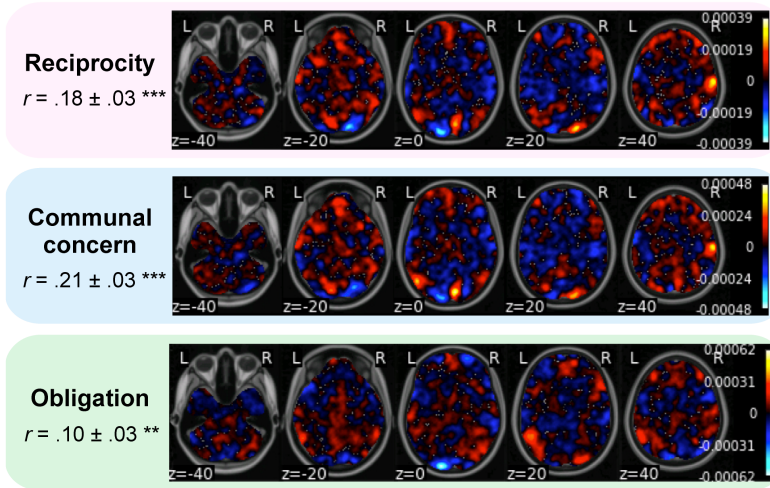

### B Individual differences in spatial alignment of multivariate patterns

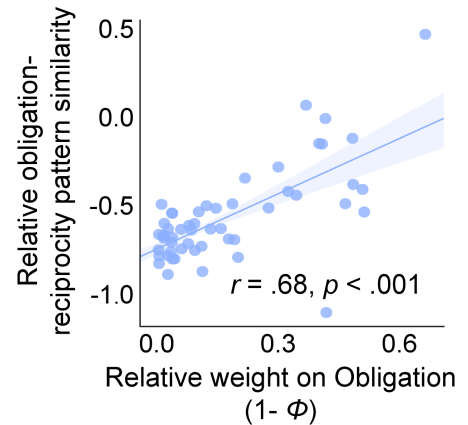

450 **Fig. 6 Neural utility model of indebtedness. (A)** Unthresholded multivariate  
 451 patterns used to predict the amounts of reciprocity, trial-by-trial communal concern  
 452 ( $\omega_B$ ) and obligation ( $E_B''$ ) separately. **(B)** The relationship between the relative weight  
 453 on obligation ( $1 - \Phi$ ) derived from behavior and a neurally derived metric of how  
 454 much obligation vs. communal feelings influenced reciprocity behavior (Eq. 3).

455

456

457 Finally, we examined if brain activity reflected individual differences in the degree to  
 458 which participants were motivated by obligation relative to communal concern in  
 459 their decisions based on spatial alignment of the multivariate brain patterns  
 460 (Kriegeskorte et al., 2008). The relative influence of a particular feeling on behavior  
 461 should be reflected in the spatial similarity of the corresponding brain patterns. For  
 462 example, if a participant weights obligation more than communal concern, then there  
 463 should be a corresponding relationship reflected in the spatial similarity of the brain  
 464 patterns of each construct. We operationalized relative pattern similarity as:

465

$$466 \text{ relative pattern similarity} = \text{corr}(\vec{Obligation}_{map}, \vec{Reciprocity}_{map}) - \text{corr}(\vec{Communal}_{map}, \vec{Reciprocity}_{map})$$

467

**Eq. 3**

468 We found strong support for this hypothesis. Participants with higher relative weights  
 469 on obligation estimated from the computational model of behavior ( $1 - \Phi$ ) also  
 470 exhibited increased relative similarity between their predictive reciprocity brain

471 representation and their predictive obligation brain representation (Eq. 3),  $r = 0.68$ ,  $p$   
472  $< 0.001$  (Fig. 6B). These results provide evidence at the neural level indicating that  
473 individuals appear to trade-off between feelings of communal concern and obligation  
474 when deciding how much to reciprocate after receiving help from a benefactor.

475

476

## 477 **Discussion**

478 In this study, we sought to develop and validate a theoretical model of indebtedness  
479 across three separate experiments, by combining large-scale experience sampling,  
480 behavioral measurements in an interpersonal game, computational modeling, and  
481 neuroimaging. These studies provide consistent evidence suggesting that indebtedness  
482 is comprised of two distinct components - guilt and the sense of obligation. When  
483 participants believe that a benefactor cares for them and has altruistic intentions, they  
484 are more likely to feel guilt, which along with gratitude, contributes to feelings of  
485 communal concern. Alternatively, when participants believe a benefactor possesses  
486 strategic intentions and expects something in return, they are more likely to  
487 experience a sense of obligation. Both communal concern and obligation motivate the  
488 beneficiary to reciprocate, while obligation is more likely to lead to rejection of help  
489 when a benefactor has strategic intentions.

490

491 An important contribution of this work is our use of different types of experimental  
492 designs to test the predictions of our theory. First, we used an open-ended survey to  
493 capture lay intuitions about indebtedness based on past experiences from a relatively  
494 large sample. Overall, we find strong support that the feeling of indebtedness  
495 resulting from receiving help from others can be attributed to two distinct emotions –  
496 guilt from burdening the favor-doer and obligation to repay the favor. Using topic  
497 modeling on lay definitions of indebtedness, we find that guilt and gratitude appear to  
498 load on the same topic, while words pertaining to burden and negative bodily states

499 load on a separate topic. Second, we used a laboratory task designed to elicit  
500 indebtedness in the context of a social interaction and specifically manipulated  
501 information intended to shift the benefactor's perceptions of the beneficiary's  
502 intentions underlying their decisions. Although our manipulation was subtle, we find  
503 that it was able to successfully change participants' appraisals about how much the  
504 beneficiary cared about them and their beliefs about how much money the benefactor  
505 expected in return. Consistent with appraisal theory (Ellsworth and Scherer, 2003;  
506 Frijda, 1993; Frijda et al., 1989; Lazarus and Smith, 1988; Scherer, 1999; Smith and  
507 Ellsworth, 1985), these shifts in appraisals influenced participants' subjective  
508 emotions and ultimately their behavior. Altruistic intentions lead to increased guilt  
509 and gratitude, while strategic intentions increase feelings of obligation. All three  
510 feelings were associated with increased monetary reciprocation back to the benefactor  
511 after receiving help. However, only obligation increased the rejection of help when  
512 that option was available to the participant.

513

514 One of the most notable contributions of this work is the development and validation  
515 of a computational model of indebtedness. The majority of research on emotions  
516 relies on self-reported subjective feelings (Lench et al., 2011; Lindquist et al., 2013),  
517 which has a number of limitations, such as its dependence on participants' ability to  
518 introspect (Larsen and Fredrickson, 1999; Nisbett and Wilson, 1977). Formalizing  
519 emotions using computational models is critical to advancing theory, characterizing  
520 their impact on behavior, and identifying neural and physiological substrates (Chang  
521 and Jolly, 2018; Chang and Smith, 2015; Jolly and Chang). Our model provides a  
522 demonstration of how emotion appraisal theory (Ellsworth and Scherer, 2003; Frijda,  
523 1993; Frijda et al., 1989; Lazarus and Smith, 1988; Scherer, 1999; Smith and  
524 Ellsworth, 1985) can be integrated with psychological game theory (Dufwenberg and  
525 Kirchsteiger, 2004; Geanakoplos et al., 1989) to predict behavior (Chang and Smith,  
526 2015). We model emotions as arising from appraisals about perceived care and beliefs

527 about the beneficiary's expectations, which both ultimately increase the likelihood of  
528 the benefactor selecting actions to reciprocate the favor. This model contributes to a  
529 growing family of game theoretic models of social emotions such as guilt (Battigalli  
530 and Dufwenberg, 2009; Chang et al., 2011), gratitude (Khalmetski et al., 2015), and  
531 anger (Battigalli et al., 2015; Chang and Sanfey, 2013).

532

533 We provide a rigorous validation of our indebtedness model across behaviors in the  
534 task, subjective experiences, and neural correlates. First, our model does remarkably  
535 well at predicting participants' reciprocity behavior. It also captures our theoretical  
536 predictions that participants would be more likely to reject help when they perceived  
537 the benefactor to have strategic intentions than when they perceived the benefactor to  
538 have altruistic intentions. Second, the parameters of our model were able to accurately  
539 capture self-reported appraisals of second-order belief of the benefactor's expectation  
540 for repayment and perceived care, which validates our model from subjective  
541 experiences. Third, our brain imaging analyses provide an additional level of  
542 validation that each feeling reflects a distinct psychological process and that intention  
543 inference plays a key role during this process. Consistent with previous work on guilt  
544 (Chang et al., 2011; Koban et al., 2013; Krajbich et al., 2009; Yu et al., 2014) and  
545 gratitude (Fox et al., 2015; Yu et al., 2017; Yu et al., 2018), our model representation  
546 of feelings of communal concern correlated with increased activity in the insula,  
547 dlPFC, and default mode network including the vmPFC and precuneus. Obligation, in  
548 contrast, captured participants' second order beliefs about expectations of repayment  
549 and correlated with increased activation in regions routinely observed in mentalizing  
550 including the dmPFC and TPJ (Hampton et al., 2008; Ruff and Fehr, 2014a; Van  
551 Overwalle and Baetens, 2009). These brain results are particularly noteworthy as we  
552 are unaware of any prior work that has probed the neural basis of indebtedness.  
553 Fourth, our computational modeling reveals that individuals who are more sensitive to  
554 obligation tend to reciprocate more to strategic favors than to altruistic favors,

555 indicating a greater susceptibility to hidden costs when receiving strategic favors (Bal,  
556 2005; Fehr and Gächter, 2000; Malmendier and Schmidt, 2012). This quantitative  
557 measure might be more sensitive than self-report measures and could be used as an  
558 individual difference measure in future work.

559

560 We provide an even stronger test of our ability to characterize the neural processes  
561 associated with indebtedness by deriving a “neural utility” model. Previous work has  
562 demonstrated that it is possible to build brain models of preferences that can predict  
563 behaviors (Knutson et al., 2007; Smith et al., 2014). In this series of analyses, we  
564 trained multivoxel patterns of brain activity to predict participants’ communal and  
565 obligation feelings. We then used these brain-derived predictions of communal and  
566 obligation feelings to predict how much money they ultimately reciprocated to the  
567 beneficiary. Remarkably, we found that this neural utility model of indebtedness was  
568 able to predict individual decisions entirely from brain activity and almost as well as a  
569 control brain-model that was designed to directly predict reciprocity behavior. In  
570 addition, we find that the more the neural activity during reciprocity resembled brain  
571 patterns predictive of obligation compared with communal concern, the more our  
572 computational model attributed obligation to behavior, providing a direct link  
573 between these distinct feelings and patterns of brain activity.

574

575 Our study has several potential limitations, which are important to acknowledge. First,  
576 though we directly and conceptually replicate our key findings across multiple  
577 samples, all of our experiments recruit experimental samples from a Chinese  
578 population. It is possible that there exist cultural differences in the experience of  
579 indebtedness, which may not generalize to other parts of the world. For example,  
580 compared with Westerners who commonly express gratitude when receiving  
581 benevolent help, Japanese participants often respond with "Thank you" or "I am  
582 sorry" (Benedict, 1946; Kotani, 2002). However, we think this is unlikely as both

583 guilt toward favor-doers (e.g., the organ transplant patients' guilt) (Achille et al., 2006;  
584 Annema et al., 2013; Látos et al., 2016; Shemesh et al., 2017) and the sense of  
585 obligation to repay (Watkins et al., 2006) have been consistently observed in various  
586 Western populations. Second, our laboratory-based task was designed to test a key  
587 assumption in our theory that individuals trade-off feelings of communal concern and  
588 obligation when responding to receiving help. Although we found compelling  
589 evidence distinguishing between feelings of communal concern and obligation, our  
590 current task was unable to distinguish between guilt and gratitude. Theoretically, we  
591 predicted that both guilt and gratitude arise from altruistic favors and are part of a  
592 broader encompassing construct of communal concern (Baumeister et al., 1994; Le et  
593 al., 2018). This construct is related to communal relationships described by  
594 psychologists, sociologists, and anthropologists (Algoe, 2012; Algoe et al., 2008;  
595 Clark and Mills, 1993; Clark and Mills, 2012; Elfers and Hlava, 2016; McCullough et  
596 al., 2001; Nowak and Sigmund, 2005), while obligation, in contrast, corresponds  
597 more to transactional exchange relationships (Greenberg, 1980; Greenberg and  
598 Westcott, 1983; Watkins et al., 2006). Future work might design tasks that can better  
599 differentiate between gratitude and guilt to explore whether these two emotions of  
600 communal concern have shared or differential neurocognitive mechanisms (Chang et  
601 al., 2011; Fox et al., 2015; Koban et al., 2013; Krajbich et al., 2009; Yu et al., 2017;  
602 Yu et al., 2018; Yu et al., 2014).

603

604 Gift-giving, favor-exchanges, and providing assistance are behaviors reflective of the  
605 relationship between individuals or groups. On the one hand, while altruistic favors  
606 often engender reciprocity and gratitude, they can also elicit guilt in a recipient who  
607 feels burdensome to a benefactor. On the other hand, favors in transactive  
608 relationships in which reciprocity is expected, can engender a feeling of obligation for  
609 a recipient. Previous studies have independently investigated these two components of  
610 indebtedness (Benedict, 1946; Greenberg, 1980; Greenberg and Shapiro, 1971;



611 Greenberg and Westcott, 1983; Kotani, 2002; Naito and Washizu, 2015; Tsang, 2006;  
612 Watkins et al., 2006). Here, by developing a comprehensive and systematic model of  
613 indebtedness, our work emphasizes how appraisals about the intentions behind a favor  
614 are critical to the generation of these distinct emotions, which in turn motivates how  
615 willing individuals are to accept or reject help and ultimately reciprocate the favor.  
616 Our model provides not only a general framework that integrates previous  
617 independent findings, but also a theoretical bases for future investigations. For  
618 example, although we test our theory primarily in an interpersonal task on favors,  
619 which involve unsolicited help between strangers to reduce pain, we believe these  
620 processes will generalize more broadly to receiving help in most interpersonal  
621 contexts. This work highlights the importance of considering the psychological and  
622 neural mechanisms underlying the hidden costs of receiving help (Bal, 2005; Fehr and  
623 Gächter, 2000; Malmendier and Schmidt, 2012).

## 624 **Methods**

625 **Participants.** In total, the data of 1,619 (812 females,  $18.9 \pm 2.0$  (SD) years), 51 (33  
626 females,  $19.9 \pm 1.6$  years), 57 (45 females,  $20.1 \pm 1.8$  years), and 53 (29 females,  $20.9$   
627  $\pm 2.3$  years) healthy graduate and undergraduate students were included for Study 1  
628 (experience sampling), Studies 2a and 2b (behavioral studies) and Study 3 (fMRI  
629 study), respectively. In addition, 80 participants (45 females,  $22.6 \pm 2.58$  years) were  
630 recruited for the word classification task to extract emotion-related words in the  
631 definition of indebtedness. All of the experiments were carried out in accordance with  
632 the Declaration of Helsinki and were approved by the Ethics Committee of the School  
633 of Psychological and Cognitive Sciences, Peking University. Informed written  
634 consent was obtained from each participant before each experiment. Consent to  
635 publish was obtained for each image in Fig. 2C.

636

637 **Topic Modeling.** For the self-reported definition of indebtedness analysis, we used the  
638 “Wordcloud” ([https://amueller.github.io/word\\_cloud/index.html](https://amueller.github.io/word_cloud/index.html)) and “Jieba”  
639 (<https://github.com/fxsjy/jieba>) packages to conduct text segmentation. We excluded  
640 stop words using Wordcloud dataset and extracted the 100 words with the highest  
641 weight/frequency in the definitions of indebtedness using Term Frequency-Inverse  
642 Document Frequency (TF-IDF) (Neto et al., 2000; Salton and Buckley, 1988). These  
643 100 words were then classified by an independent sample of participants ( $N = 80$ ) into  
644 levels of appraisal, emotion, behavior, person and other. Because Chinese retains its  
645 own characters of various structures, synonym combinations were implemented  
646 before topic modeling (Liu, 2016). We conducted Latent Dirichlet Allocation (LDA)  
647 based topic modeling on only the emotional words of indebtedness using collapsed  
648 Gibbs sampling implemented in the lda package (<https://lda.readthedocs.io/en/latest/>)  
649 (Blei et al., 2003). We then selected the model with the best model fit using topic  
650 numbers ranging from 2 to 10, and found that the two-topic solution performed the  
651 best.

652

653 **Modeling of each utility term.** Each item in Eq. 1 ( $\pi_B$ ,  $U_{Communal}$  and  $U_{Obligation}$ ) was  
 654 defined according to the corresponding context of decision-making. We modeled the  
 655 utility of self-interest ( $\pi_B$ ) as Eq. 4. For each amount of reciprocity ( $D_B$ ), the  
 656 self-interest was defined as the percentage of money the participant receives from the  
 657 total endowment ( $\gamma_B$ ). For the decisions of whether to accept or reject help, the  
 658 self-interest from accepting help was defined as the percentage of pain reduction from  
 659 the total amount of the maximum pain reduction, which depended on how much the  
 660 benefactor spent to help ( $D_A$ ) and the exchange rate between the benefactor's cost and  
 661 the participant's benefit ( $\mu$ ).

662

$$\pi_B = \begin{cases} \frac{\gamma_B - D_B}{\gamma_B} & \text{Reciprocity} \\ \frac{D_A * \mu}{\max(D_A * \mu)} & \text{Accept/Reject help} \end{cases} \quad \text{Eq. 4}$$

664

665 Participant's second-order beliefs of how much the benefactor expected in each trial  
 666 were determined by the benefactor's intention and benefactor's cost ( $D_A$ ) (Eq. 5). In  
 667 the altruistic condition, participants knew that the benefactor did not expect them to  
 668 reciprocate, so we fixed the second-order belief as zero ( $E_B''$ ). However, in the  
 669 strategic condition, the benefactor knew that the participant had money that they  
 670 could spend to repay the favor. In this condition, we modeled the  $E_B''$  as proportional  
 671 to the amount of money the benefactor spent to help the participant.

672

$$E_B'' = \begin{cases} 0 & \text{Altruistic condition} \\ D_A & \text{Strategic condition} \end{cases} \quad \text{Eq. 5}$$

674

675 The participant's perceived care ( $\omega_B$ ) in each trial was defined as a function of the  
 676 benefactor's cost and second-order belief (Eq. 6). Specifically, we assumed that the  
 677 perceived care from the help increased as a linear function of how much the  
 678 benefactor spent ( $D_A$ ) from his/her endowment ( $\gamma_A$ ); however, this effect was reduced  
 679 by the second-order belief of the benefactor's expectation for repayment ( $E_B''$ ). Here,  
 680 the parameter kappa ( $\kappa$ ) is a free parameter ranging from 0 and 1 that represents the  
 681 extent to which the benefactor's expectation for repayment reduced the participant's  
 682 perceived care.

683

$$\omega_B = \frac{D_A - \kappa_B * E_B''}{\gamma_A} \quad \text{Eq. 6}$$

684

685

686 We defined  $U_{Communal}$  and  $U_{Obligation}$  as functions of  $\omega_B$  and  $E_B''$  respectively, but the  
 687 formulations were slightly different for predicting reciprocity and rejection decisions  
 688 (Eq. 7 and Eq. 8).

689

$$U_{Communal} = \begin{cases} -\left(\frac{\omega_B * \gamma_B - D_B}{\gamma_B}\right)^2 & \text{Reciprocity} \\ \omega_B & \text{Accept/Reject help} \end{cases} \quad \text{Eq. 7}$$

690

691

$$U_{Obligation} = \begin{cases} -\left(\frac{E_B'' - D_B}{\gamma_B}\right)^2 & \text{Reciprocity} \\ -\frac{E_B''}{\gamma_B} & \text{Accept/Reject help} \end{cases} \quad \text{Eq. 8}$$

692

693

694 Specifically, for reciprocity,  $U_{Communal}$  and  $U_{Obligation}$  were defined as functions of  $\omega_B$   
 695 and  $E_B''$ . Participants maximized utility of communal concern ( $U_{Communal}$ ) by  
 696 minimizing the difference between the benefactor's reciprocity ( $D_B$ ) and the amount  
 697 of money the participant was willing to repay the benefactor's kindness, which  
 698 depended on the perceived care ( $\omega_B$ ) and the endowment size ( $\gamma_B$ ). In contrast,  
 699 participants maximized utility of obligation ( $U_{Obligation}$ ) by minimizing the difference  
 700 between the amount they reciprocated ( $D_B$ ) and their second-order belief of how much  
 701 they believed the benefactor expected them to return ( $E_B''$ ). For decisions of whether  
 702 to reject help,  $U_{Communal}$  and  $U_{Obligation}$  were defined as the linear functions of  $\omega_B$  and  
 703  $E_B''$ .

704

705 We modeled the utility of reciprocating  $U(D_B)$  as:

706

$$U(D_B) = \theta_B * \frac{\gamma_B - D_B}{\gamma_B} - (1 - \theta_B) * (\phi_B * \left(\frac{\omega_B * \gamma_B - D_B}{\gamma_B}\right)^2 + (1 - \phi_B) * \left(\frac{E_B'' - D_B}{\gamma_B}\right)^2) \quad \text{Eq. 9}$$

707

708

709

710 Where  $\Phi$  is defined as a free parameter between 0 and 1, which captures the trade-off  
 711 between feelings of communal concern and obligation. We estimated the model  
 712 parameters for Eq. 9 by minimizing the sum of squared error of the percentiles. To

713 minimize the possibility of the algorithm getting stuck in a local minimum, we used  
714 the best fitting model over 1000 random starting values.

715

$$SSE = \sum_{t=1}^n \left( \frac{D_B(t) - \max(U(D_B(t)))}{\gamma_B} * 100 \right)^2 \quad \text{Eq. 10}$$

716

717

718 In contrast to reciprocity, decisions of whether to accept or reject help might be more  
719 complex. The sense of obligation may motivate rejecting the help to avoid being in  
720 the benefactor's debt (Greenberg, 1980; Greenberg and Shapiro, 1971; Greenberg and  
721 Westcott, 1983). For communal concern, while gratitude may motivate one to accept  
722 help to build a communal relationship (Algoe, 2012; Algoe et al., 2008), guilt may  
723 motivate one to reject to avoid burdening a benefactor (Battigalli and Dufwenberg,  
724 2009; Chang et al., 2011). We model the utility of accepting help as:

725

$$U(\text{Accept}) - U(\text{Reject}) = \theta_B * \frac{D_A * \mu}{\max(D_A * \mu)} + (1 - \theta_B) * (\phi_B * \omega_B - (1 - |\phi_B|) * \frac{E_B''}{\gamma_B}) \quad \text{Eq. 11}$$

726

727

728

729 Where  $\Phi$  lies on the interval of  $[-1, 1]$ . Specifically,  $\Phi < 0$  indicates that the  
730 communal concern motives the participants to reject the help, while  $\Phi > 0$  indicates  
731 that the communal concern motives the participants to accept the help. The individual  
732 weight on obligation is captured by  $1 - |\Phi|$ , which ranges from 0 to 1. We estimated  
733 the parameters for Eq. 10, by maximizing the log-likelihood.

734

$$LLE = - \sum_{t=1}^n \log(P(D_B(t))) \quad \text{Eq. 12}$$

735

736

737 We conducted parameter recovery analyses to ensure that our model was robustly  
738 identifiable (Fareri et al., 2015). To this end, we simulated data for each participant  
739 using our models and the data from each trial of the experiment and compared how  
740 well we were able to recover these parameters by fitting the model to the simulated

741 data. We refit the model using 1000 random start locations to minimize the possibility  
742 of the algorithm getting stuck in a local minimum. We then assessed the degree to  
743 which the parameters could be recovered by calculating the similarity between all the  
744 parameters estimated from the observed behavioral data and all the parameters  
745 estimated from the simulated data using a Pearson correlation.

746

747 ***FMRI Data Acquisition and Analysis.*** Images were acquired using a 3-T Prisma  
748 Siemens scanner (Siemens AG, Erlangen, Germany). We used standard preprocessing  
749 in SPM12 (Wellcome Trust Centre for Neuroimaging) and estimated three general  
750 linear models for each participant that focused on the neural responses during the  
751 Outcome phase at which participants saw the benefactor's help decisions. As our  
752 model hypothesizes that feelings of communal concern and obligation arise from the  
753 perceived care from the help ( $\omega_B$ ) the second-order belief of the benefactor's  
754 expectation for repayment ( $E_B''$ ) respectively, we used  $\omega_B$  and  $E_B''$  in the  
755 computational model as indices for communal and obligation feelings and conducted  
756 parametric analyses. Brain responses to  $\omega_B$  and  $E_B''$  reflected how much information  
757 in neural patterns was associated with each type of feeling in the brain. An alternative  
758 approach is to use the  $U_{Communal}$  and the  $U_{Obligation}$  from our computation model as  
759 parametric modulators when estimating brain responses. However, in our model,  
760  $U_{Communal}$  and the  $U_{Obligation}$  were defined as negative quadratic functions, the  
761 maximum values of which were zero. As we predicted and observed, participants  
762 behaved to maximize their  $U_{Obligation}$  by minimizing the differences between the  
763 amount of reciprocity and  $E_B''$ , and to maximize their  $U_{Communal}$  by minimizing the  
764 differences between the amount of reciprocity and  $\omega_B$ . Therefore, in a large  
765 proportion of trials, the  $U_{Obligation}$  and  $U_{Communal}$  were near zero as a result of  
766 participant's decisions, making them inefficient for parametric analysis to capture  
767 how successfully participants behaved in accordance with their feelings. In contrast,  
768  $\omega_B$  and  $E_B''$  better captured the inferences that comprised participants' feelings and

769 were more suitable for testing our hypotheses about brain responses. For whole brain  
770 analyses, all results were corrected for multiple comparisons using the threshold of  
771 voxel-level  $p < 0.001$  (uncorrected) combined with cluster-level threshold  $p < 0.05$   
772 (FWE-corrected). This threshold provides an acceptable family error control (Eklund  
773 et al., 2016; Flandin and Friston, 2017). To reveal the psychological components  
774 associated with the processing of reciprocity, communal concern and obligation, we  
775 conducted meta-analytic decoding using the Neurosynth Image Decoder (Yarkoni et  
776 al., 2011) (<http://neurosynth.org>). This allowed us to quantitatively evaluate the  
777 spatial similarity (Chang et al., 2013) between any Nifti-format brain image and  
778 selected meta-analytical images generated by the Neurosynth database. Using this  
779 online platform, we compared the unthresholded contrast maps of reciprocity,  
780 communal concern and obligation against the reverse inference meta-analytical maps  
781 for 23 terms generated from this database, related to basic cognition (i.e., Imagine,  
782 Switching, Salience, Conflict, Memory, Attention, Cognitive control, Inhibition,  
783 Emotion, Anxiety, Fear, and Default mode) (Barrett and Satpute, 2013), social  
784 cognition (Empathy, Theory of mind, Social, and Imitation) (Adolphs, 2009) and  
785 decision-making (Reward, Punishment, Learning, Prediction error, Choice, and  
786 Outcome) (Ruff and Fehr, 2014b).

787

788 ***Neural Utility Model of Indebtedness.*** We applied multivariate pattern analysis  
789 (MVPA) (Haynes and Rees, 2006) and trained two whole-brain models to predict the  
790 communal concern ( $\omega_B$ ) and obligation ( $E_B''$ ) terms in our behavioral model  
791 separately for each participant using principle components regression with 5-fold  
792 cross-validation (Chang et al., 2015; Wager et al., 2013; Woo et al., 2017), which was  
793 carried out in Python 3.6.8 using the NLTools package (Chang et al., 2018) version  
794 0.3.14 (<http://github.com/cosanlab/nltools>). We used whole-brain single-trial beta  
795 maps of the Outcome period for each participant to separately predict  $\omega_B$  and  $E_B''$ . For  
796 each whole-brain model, we extracted the cross-validated prediction accuracy ( $r$  value)

797 for each participant, conducted  $r$  to  $z$  transformation, and then conducted a  
798 one-sample sign permutation test to evaluate whether each model was able to predict  
799 the corresponding term. Next, we assessed the degree to which our brain models  
800 could account for reciprocity behavior. We used cross-validated neural predictions of  
801 communal concern ( $\omega_B$ ) and obligation ( $E_B''$ ) feelings as inputs to our computational  
802 model of reciprocity behavior instead of the original terms (Eq. 2). We trained a  
803 whole-brain model to predict trial-by-trial reciprocity for each participant as a  
804 benchmark comparison. Finally, for each participant, we estimated the whole-brain  
805 spatial similarity (Kriegeskorte et al., 2008) between the two prediction maps of  
806 communal and obligation feelings and the reciprocity prediction map. The relative  
807 obligation-reciprocity similarity was defined as Eq. 3 and was used to examine  
808 whether this neural alignment could predict individual relative weight on obligation  
809 during reciprocity.

810

811 All the statistical tests in the current study are two-tailed tests. A detailed description  
812 of methods including participants, procedures, computational modeling, and fMRI  
813 data analyses are given in *SI Appendix*.

814

#### 815 **Data availability**

816 All data needed to evaluate the conclusions in the current study are present in the  
817 paper and the *SI Appendix*. Original materials are available from the corresponding  
818 author upon reasonable request.

819

#### 820 **Code availability**

821 The codes used in the current study are available from the corresponding author upon  
822 reasonable request.



823 **Acknowledgements**

824 We thank Dr. Christian C. Ruff for his comments and suggestions on this article, Ms.  
825 Yunyan Duan's for her advice in topic modeling, and Ms. Zhewen He for the  
826 preparation of the manuscript. This work was supported by National Basic Research  
827 Program of China (973 Program: 2015CB856400), National Natural Science  
828 Foundation of China (91232708, 31170972, 31630034, 31900798, 71942001), China  
829 Postdoctoral Science Foundation (2019M650008), the National Science Foundation  
830 of USA (CAREER 1848370), and the National Institute of Health (R01MH116026).  
831 Thanks are also due to Graduate School of Peking University to support Dr. Gao for  
832 visiting Dartmouth College.

## Reference

- Achille, M.A., Ouellette, A., Fournier, S., Vachon, M., and Hébert, M.J. (2006). Impact of stress, distress and feelings of indebtedness on adherence to immunosuppressants following kidney transplantation. *Clin Transplant* 20, 301-306.
- Adolphs, R. (2009). The social brain: neural basis of social knowledge. *Annu Rev Psychol* 60, 693-716.
- Akerlof, G.A. (1982). Labor contracts as partial gift exchange. *The quarterly journal of economics* 97, 543-569.
- Algoe, S.B. (2012). Find, remind, and bind: The functions of gratitude in everyday relationships. *Social and Personality Psychology Compass* 6, 455-469.
- Algoe, S.B., Haidt, J., and Gable, S.L. (2008). Beyond reciprocity: gratitude and relationships in everyday life. *Emotion* 8, 425.
- Annema, C., Roodbol, P.F., Stewart, R.E., and Ranchor, A.V. (2013). Validation of the Dutch version of the transplant effects questionnaire in liver transplant recipients. *Res Nurs Health* 36, 203-215.
- Bal, A. (2005). Doctors and drug companies. *N Engl J Med* 352, 733-734.
- Barrett, L.F., and Satpute, A.B. (2013). Large-scale brain networks in affective and social neuroscience: towards an integrative functional architecture of the brain. *Curr Opin Neurobiol* 23, 361-372.
- Battigalli, P., Corrao, R., and Dufwenberg, M. (2019). Incorporating belief-dependent motivation in games. *Journal of Economic Behavior & Organization*.
- Battigalli, P., and Dufwenberg, M. (2009). Dynamic psychological games. *Journal of Economic Theory* 144, 1-35.
- Battigalli, P., Dufwenberg, M., and Smith, A. (2015). Frustration and Anger in Games.
- Baumeister, R.F., Stillwell, A.M., and Heatherton, T.F. (1994). Guilt: an interpersonal approach. *Psychol Bull* 115, 243-267.

- Benedict, R. (1946). *Chrysanthemum and the Sword. Patterns of Japanese Culture*, Cleveland, New York (The World Publishing Company) 1946.
- Blei, D.M., and Lafferty, J.D. (2006). Dynamic topic models. In *Proceedings of the 23rd international conference on Machine learning (ACM)*, pp. 113-120.
- Blei, D.M., Ng, A.Y., and Jordan, M.I. (2003). Latent dirichlet allocation. *Journal of machine Learning research* 3, 993-1022.
- Carmichael, H.L., and MacLeod, W.B. (1997). Gift giving and the evolution of cooperation. *International Economic Review*, 485-509.
- Chang, L.J., Gianaros, P.J., Manuck, S.B., Krishnan, A., and Wager, T.D. (2015). A sensitive and specific neural signature for picture-induced negative affect. *PLoS Biol* 13, e1002180.
- Chang, L.J., and Jolly, E. (2018). Emotions as computational signals of goal error. *The nature of emotion: Fundamental questions*, 343-348.
- Chang, L.J., Jolly, E., Cheong, J.H., Burnashev, A., and Chen, A. (2018). *cosanlab/nltools: 0.3.11*. (Zenodo).
- Chang, L.J., and Sanfey, A.G. (2013). Great expectations: neural computations underlying the use of social norms in decision-making. *Soc Cogn Affect Neurosci* 8, 277-284.
- Chang, L.J., and Smith, A. (2015). Social emotions and psychological games. *Curr Opin Behav Sci* 5, 133-140.
- Chang, L.J., Smith, A., Dufwenberg, M., and Sanfey, A.G. (2011). Triangulating the neural, psychological, and economic bases of guilt aversion. *Neuron* 70, 560-572.
- Chang, L.J., Yarkoni, T., Khaw, M.W., and Sanfey, A.G. (2013). Decoding the role of the insula in human cognition: functional parcellation and large-scale reverse inference. *Cereb Cortex* 23, 739-749.
- Clark, M.S., and Mills, J. (1993). The difference between communal and exchange relationships: What it is and is not. *Pers Soc Psychol Bull* 19, 684-691.
- Clark, M.S., and Mills, J.R. (2012). A theory of communal (and exchange)

- relationships. In *Handbook of theories of social psychology*, Vol 2 (Thousand Oaks, CA: Sage Publications Ltd), pp. 232-250.
- Cooper, J.C., Kreps, T.A., Wiebe, T., Pirkel, T., and Knutson, B. (2010). When giving is good: ventromedial prefrontal cortex activation for others' intentions. *Neuron* 67, 511-521.
- Dufwenberg, M., and Kirchsteiger, G. (2004). A theory of sequential reciprocity. *Game Econ Behav* 47, 268-298.
- Eklund, A., Nichols, T.E., and Knutsson, H. (2016). Cluster failure: why fMRI inferences for spatial extent have inflated false-positive rates. *Proc Natl Acad Sci U S A* 113, 7900-7905.
- Elfers, J., and Hlava, P. (2016). *The Spectrum of Gratitude Experience* (Springer).
- Ellsworth, P.C., and Scherer, K.R. (2003). Appraisal processes in emotion. *Handbook of affective sciences* 572, V595.
- Falk, A., Fehr, E., and Fischbacher, U. (2003). On the nature of fair behavior. *Econ Inq* 41, 20-26.
- Fareri, D.S., Chang, L.J., and Delgado, M.R. (2015). Computational substrates of social value in interpersonal collaboration. *J Neurosci* 35, 8170-8180.
- Fehr, E., and Gächter, S. (2000). Fairness and retaliation: The economics of reciprocity. *J Econ Perspect* 14, 159-181.
- Fehr, E., and Schmidt, K.M. (1999). A theory of fairness, competition, and cooperation. *Q J Econ* 114, 817-868.
- Flandin, G., and Friston, K.J. (2017). Analysis of family - wise error rates in statistical parametric mapping using random field theory. *Hum Brain Mapp* hbm.23839.
- Fox, G.R., Kaplan, J., Damasio, H., and Damasio, A. (2015). Neural correlates of gratitude. *Front psychol* 6.
- Frijda, N.H. (1993). The Place of Appraisal in Emotion. *Cognition Emotion* 7, 357-387.

- Frijda, N.H., Kuipers, P., and Ter Schure, E. (1989). Relations among emotion, appraisal, and emotional action readiness. *J Pers Soc Psychol* 57, 212.
- Geanakoplos, J., Pearce, D., and Stacchetti, E. (1989). Psychological games and sequential rationality. *Game Econ Behav* 1, 60-79.
- Gonzalez, B., and Chang, L.J. (2019). Computational models of mentalizing.
- Greenberg, M.S. (1980). A theory of indebtedness. In *Social exchange* (Springer), pp. 3-26.
- Greenberg, M.S., and Shapiro, S.P. (1971). Indebtedness: An adverse aspect of asking for and receiving help. *Sociometry*, 290-301.
- Greenberg, M.S., and Westcott, D.R. (1983). Indebtedness as a mediator of reactions to aid. *New directions in helping* 1, 85-112.
- Hampton, A.N., Bossaerts, P., and O'Doherty, J.P. (2008). Neural correlates of mentalizing-related computations during strategic interactions in humans. *Proc Natl Acad Sci U S A* 105, 6741-6746.
- Haynes, J.-D., and Rees, G. (2006). Neuroimaging: decoding mental states from brain activity in humans. *Nat Rev Neurosci* 7, 523.
- Jolly, E., and Chang, L.J. *The Flatland Fallacy: Moving Beyond Low-Dimensional Thinking*. Top Cogn Sci.
- Khalmetski, K., Ockenfels, A., and Werner, P. (2015). Surprising gifts: Theory and laboratory evidence. *Journal of Economic Theory* 159, 163-208.
- Knutson, B., Rick, S., Wimmer, G.E., Prelec, D., and Loewenstein, G. (2007). Neural Predictors of Purchases. *Neuron* 53, 147-156.
- Koban, L., Corradi-Dell'Acqua, C., and Vuilleumier, P. (2013). Integration of error agency and representation of others' pain in the anterior insula. *J Cogn Neurosci* 25, 258-272.
- Kolm, S.-C. (2008). *Reciprocity: An economics of social relations* (Cambridge University Press).
- Kotani, M. (2002). Expressing gratitude and indebtedness: Japanese speakers' use of

- "I'm sorry" in English conversation. *Research on Language and Social Interaction* 35, 39-72.
- Krajbich, I., Adolphs, R., Tranel, D., Denburg, N.L., and Camerer, C.F. (2009). Economic games quantify diminished sense of guilt in patients with damage to the prefrontal cortex. *J Neurosci* 29, 2188-2192.
- Kriegeskorte, N., Mur, M., and Bandettini, P.A. (2008). Representational similarity analysis-connecting the branches of systems neuroscience. *Frontiers in systems neuroscience* 2, 4.
- Larsen, R.J., and Fredrickson, B.L. (1999). Measurement issues in emotion research. In *Well-being: The foundations of hedonic psychology* (New York, NY, US: Russell Sage Foundation), pp. 40-60.
- Látos, M., Lázár, G., Horváth, Z., Wittman, V., Szederkényi, E., Hódi, Z., Szenohradszky, P., and Csabai, M. (2016). Psychological rejection of the transplanted organ and graft dysfunction in kidney transplant patients. *Transplant Research and Risk Management* 8, 15-24.
- Lazarus, R.S., and Smith, C.A. (1988). Knowledge and appraisal in the cognition—emotion relationship. *Cognition Emotion* 2, 281-300.
- Le, B.M., Impett, E.A., Lemay Jr, E.P., Muise, A., and Tskhay, K.O. (2018). Communal motivation and well-being in interpersonal relationships: An integrative review and meta-analysis. *Psychol Bull* 144, 1-25.
- Lench, H.C., Flores, S.A., and Bench, S.W. (2011). Discrete emotions predict changes in cognition, judgment, experience, behavior, and physiology: A meta-analysis of experimental emotion elicitations. *Psychol Bull* 137, 834-855.
- Lindquist, K.A., Siegel, E.H., Quigley, K.S., and Barrett, L.F. (2013). The hundred-year emotion war: are emotions natural kinds or psychological constructions? Comment on Lench, Flores, and Bench (2011). *Psychol Bull* 139, 255-263.
- Liu, Q. (2016). A novel Chinese text topic extraction method based on LDA. In

International Conference on Computer Science & Network Technology.

- Malmendier, U., and Schmidt, K. (2012). You owe me. (National Bureau of Economic Research).
- McCullough, M.E., Kilpatrick, S.D., Emmons, R.A., and Larson, D.B. (2001). Is gratitude a moral affect? *Psychol Bull* 127, 249.
- Naito, T., and Washizu, N. (2015). Note on cultural universals and variations of gratitude from an East Asian point of view. *The Journal of Behavioral Science* 10, 1-8.
- Neilson, W.S. (1999). The economics of favors. *Journal of economic behavior & organization* 39, 387-397.
- Neto, J.L., Santos, A.D., Kaestner, C.A., Alexandre, N., and Santos, D. (2000). Document clustering and text summarization.
- Nisbett, R.E., and Wilson, T.D. (1977). Telling more than we can know: Verbal reports on mental processes. *Psychol Rev* 84, 231-259.
- Nowak, M.A., and Sigmund, K. (2005). Evolution of indirect reciprocity. *Nature* 437, 1291.
- O'doherty, J.P., Hampton, A., and Kim, H. (2007). Model - based fMRI and its application to reward learning and decision making. *Ann N Y Acad Sci* 1104, 35-53.
- Rabin, M. (1993). Incorporating fairness into game theory and economics. *The American economic review*, 1281-1302.
- Regan, D.T. (1971). Effects of a favor and liking on compliance. *J Exp Soc Psychol* 7, 627-639.
- Rotella, A., Sparks, A.M., and Barclay, P. (2020). Feelings of obligation are valuations of signaling-mediated social payoffs. *Behav Brain Sci* 43, e85.
- Ruff, C.C., and Fehr, E. (2014a). The neurobiology of rewards and values in social decision making. *Nat Rev Neurosci* 15, 549.
- Ruff, C.C., and Fehr, E. (2014b). The neurobiology of rewards and values in social

- decision making. *Nat Rev Neurosci* 15, 549-562.
- Salton, G., and Buckley, C. (1988). Term-weighting approaches in automatic text retrieval. *Information processing & management* 24, 513-523.
- Scherer, K.R. (1999). Appraisal theory.
- Shemesh, Y., Peles - Bortz, A., Peled, Y., HarZahav, Y., Lavee, J., Freimark, D., and Melnikov, S. (2017). Feelings of indebtedness and guilt toward donor and immunosuppressive medication adherence among heart transplant (HT x) patients, as assessed in a cross - sectional study with the Basel Assessment of Adherence to Immunosuppressive Medications Scale (BAASIS). *Clin Transplant* 31, e13053.
- Sherry Jr, J.F. (1983). Gift giving in anthropological perspective. *Journal of consumer research* 10, 157-168.
- Smith, A., Bernheim, B.D., Camerer, C., and Rangel, A. (2014). Neural Activity Reveals Preferences Without Choices. *Nber Working Papers* 6, 1-36.
- Smith, C.A., and Ellsworth, P.C. (1985). Patterns of cognitive appraisal in emotion. *J Pers Soc Psychol* 48, 813.
- Sul, S., Guroglu, B., Crone, E.A., and Chang, L.J. (2017). Medial prefrontal cortical thinning mediates shifts in other-regarding preferences during adolescence. *Sci Rep* 7, 8510.
- Trivers, R.L. (1971). The evolution of reciprocal altruism. *The Quarterly review of biology* 46, 35-57.
- Tsang, J.A. (2006). The effects of helper intention on gratitude and indebtedness. *Motiv Emotion* 30, 199-205.
- Van Overwalle, F., and Baetens, K. (2009). Understanding others' actions and goals by mirror and mentalizing systems: A meta-analysis. *Neuroimage* 48, 564-584.
- Wager, T.D., Atlas, L.Y., Lindquist, M.A., Roy, M., Woo, C.-W., and Kross, E. (2013). An fMRI-based neurologic signature of physical pain. *N Engl J Med* 368, 1388-1397.
- Watkins, P.C., Scheer, J., Ovnicek, M., and Kolts, R. (2006). The debt of gratitude:



Dissociating gratitude and indebtedness. *Cognition Emotion* 20, 217-241.

Woo, C.W., Chang, L.J., Lindquist, M.A., and Wager, T.D. (2017). Building better biomarkers: brain models in translational neuroimaging. *Nat Neurosci* 20, 365-377.

Yarkoni, T., Poldrack, R.A., Nichols, T.E., Van Essen, D.C., and Wager, T.D. (2011). Large-scale automated synthesis of human functional neuroimaging data. *Nat Meth* 8, 665.

Yu, H., Cai, Q., Shen, B., Gao, X., and Zhou, X. (2017). Neural substrates and social consequences of interpersonal gratitude: Intention matters. *Emotion* 17, 589-601.

Yu, H., Gao, X., Zhou, Y., and Zhou, X. (2018). Decomposing gratitude: representation and integration of cognitive antecedents of gratitude in the brain. *J Neurosci*, 2944-2917.

Yu, H., Hu, J., Hu, L., and Zhou, X. (2014). The voice of conscience: neural bases of interpersonal guilt and compensation. *Soc Cogn Affect Neurosci* 9, 1150-1158.
